# Supplementary material for: Theoretical study on the mechanism of H2activation mediated by two transition metal thiolate complexes: Homolytic for Ir, heterolytic for Rh
Source: Royal Society of Chemistry journal article supplement (doi:10.1039/b910589a), 2009-11-11
Supplement: b910589a.pdf [file b910589a.pdf]

## Supporting Information (25 pages)

Theoretical Study on the Mechanism of H<sub>2</sub> Activation Mediated by two transition metal thiolate complexes: Homolytic for Ir, Heterolytic for Rh

Jingcong Tao and Shuhua Li\*

**Table S1**  $E_{elec}$  (B3LYP/BS2//B3LYP/BS1), thermal correction to Gibbs free energy ( $TCGE$ ),  $G_{gas}^{253}$  ( $E_{elec} + TCGE$ ),  $\Delta G_{solv}$  (kcal/mol) of all stationary points in the reaction of the iridium thiolate complex with H<sub>2</sub>. For each species, the relative electronic energy of the triplet state ( $\Delta E_{S-T}$ ) (relative to that of the singlet state) is also listed below.

| Species                             | $E_{elec}$ (a.u.) | TCGE (a.u.) | $G_{253}^{gas}$ (a.u.) | $\Delta G_{solv}$ | Species                             | $E_{elec}$ (a.u.) | $\Delta E_{S-T}$ (kcal/mol) |
|-------------------------------------|-------------------|-------------|------------------------|-------------------|-------------------------------------|-------------------|-----------------------------|
| <b>1a<sup>1</sup>+H<sub>2</sub></b> | -2285.2467        | 0.7026      | -2284.5441             | -14.73            | <b>1a<sup>3</sup>+H<sub>2</sub></b> | -2285.2045        | 26.5                        |
| <b>TS1-a<sup>1</sup></b>            | -2285.2254        | 0.7120      | -2284.5134             | -16.04            | <b>TS1-a<sup>3</sup></b>            | -2285.1875        | 23.8                        |
| <b>2a<sup>1</sup></b>               | -2285.2531        | 0.7192      | -2284.5339             | -17.30            | <b>2a<sup>3</sup></b>               | -2285.2081        | 28.2                        |
| <b>TS2-a<sup>1</sup></b>            | -2285.2409        | 0.7159      | -2284.5250             | -15.34            | <b>TS2-a<sup>3</sup></b>            | -2285.1887        | 32.8                        |
| <b>4a<sup>1</sup></b>               | -2285.2623        | 0.7207      | -2284.5416             | -15.62            | <b>4a<sup>3</sup></b>               | -2285.2048        | 36.1                        |

**Table S2**  $E_{elec}$  (B3LYP/BS2//B3LYP/BS1), thermal correction to Gibbs free energy ( $TCGE$ ),  $G_{gas}^{233}$  ( $E_{elec} + TCGE$ ),  $\Delta G_{solv}$  (kcal/mol) of all stationary points in the reaction of the rhodium thiolate complex with  $H_2$ . For each species, the relative electronic energy of the triplet state ( $\Delta E_{S-T}$ ) (relative to that of the singlet state) is also listed below.

| Species                             | $E_{elec}$ (a.u.) | TCGE (a.u.) | $G_{233}^{gas}$ (a.u.) | $\Delta G_{solv}$ | Species                             | $E_{elec}$ (a.u.) | $\Delta E_{S-T}$ (kcal/mol) |
|-------------------------------------|-------------------|-------------|------------------------|-------------------|-------------------------------------|-------------------|-----------------------------|
| <b>1b<sup>1</sup>+H<sub>2</sub></b> | -2290.0367        | 0.7097      | -2289.3270             | -18.79            | <b>1b<sup>3</sup>+H<sub>2</sub></b> | -2290.0090        | 17.4                        |
| <b>TS1-b<sup>1</sup></b>            | -2290.0228        | 0.7200      | -2289.3028             | -20.14            | <b>TS1-b<sup>3</sup></b>            | -2289.9915        | 19.6                        |
| <b>3b<sup>1</sup></b>               | -2290.0324        | 0.7228      | -2289.3096             | -21.30            | <b>2b<sup>3</sup></b>               | -2289.9936        | 24.3                        |
| <b>TS2-b<sup>1</sup></b>            | -2290.0233        | 0.7198      | -2289.3035             | -20.15            | <b>TS2-b<sup>3</sup></b>            | -2289.9762        | 29.6                        |
| <b>4b<sup>1</sup></b>               | -2290.0483        | 0.7252      | -2289.3231             | -19.37            | <b>4b<sup>3</sup></b>               | -2290.0043        | 27.6                        |

**Table S3**  $E_{elec}$  (BMK/TPSSh/BS2// B3LYP /BS1),  $G_{gas}$  ( $E_{elec} + TCGE$ ),  $\Delta G_{solv}$  (kcal/mol)

and the relative free energies in solution  $G_{solu}$  (kcal/mol) of all stationary points in the reaction of the rhodium/rhodium thiolate complex with  $H_2$ . Energies are reported in a.u.

| species                 | $E_{elec}$ (a.u.) |            | $G_{gas}$ (a.u.) |            | $\Delta G_{solv}$ |        | $G_{solu}$ |       |
|-------------------------|-------------------|------------|------------------|------------|-------------------|--------|------------|-------|
|                         | BMK               | TPSSh      | BMK              | TPSSh      | BMK               | TPSSh  | BMK        | TPSSh |
| <b>1a+H<sub>2</sub></b> | -2283.3923        | -2285.3195 | -2282.6897       | -2284.6169 | -14.97            | -14.64 | 0.0        | 0.0   |
| <b>TS1-a</b>            | -2283.3803        | -2285.3028 | -2282.6683       | -2284.5908 | -16.15            | -15.91 | 11.2       | 15.1  |
| <b>2a</b>               | -2283.4020        | -2285.3298 | -2282.6828       | -2284.6106 | -17.38            | -17.23 | 1.9        | 1.4   |
| <b>TS2-a</b>            | -2283.3906        | -2285.3169 | -2282.6747       | -2284.6010 | -15.25            | -15.30 | 9.1        | 9.3   |
| <b>4a</b>               | -2283.4127        | -2285.3360 | -2282.6920       | -2284.6153 | -15.58            | -15.58 | -2.0       | 0.1   |
| <b>1b+H<sub>2</sub></b> | -2288.1637        | -2290.0999 | -2287.4540       | -2289.3902 | -19.22            | -18.68 | 0.0        | 0.0   |
| <b>TS1-b</b>            | -2288.1587        | -2290.0894 | -2287.4387       | -2289.3694 | -20.32            | -19.99 | 8.5        | 11.8  |
| <b>3b</b>               | -2288.1673        | -2290.1004 | -2287.4445       | -2289.3776 | -21.33            | -21.23 | 3.9        | 5.3   |
| <b>TS2-b</b>            | -2288.1529        | -2290.0905 | -2287.4331       | -2289.3707 | -20.13            | -20.09 | 12.2       | 10.8  |
| <b>4b</b>               | -2288.1766        | -2290.1110 | -2287.4514       | -2289.3858 | -19.26            | -19.32 | 1.6        | 2.1   |

The coordinates of the optimized structures in gas phase.

For the iridium thiolate complex:

**1a**

|    |             |             |             |
|----|-------------|-------------|-------------|
| C  | 0.98423400  | -3.16998100 | -1.23999300 |
| C  | -0.44861700 | -3.23126100 | -1.23266300 |
| C  | -0.94804200 | -2.05493800 | -1.92591800 |
| C  | 0.17214900  | -1.26681500 | -2.35636700 |
| C  | 1.37104200  | -1.93261000 | -1.88350000 |
| C  | 1.93864100  | -4.24697600 | -0.81471100 |
| H  | 2.31883900  | -4.76735700 | -1.70350200 |
| H  | 2.80412600  | -3.84862800 | -0.27654200 |
| H  | 1.45633600  | -4.99842900 | -0.18586100 |
| C  | -1.30910900 | -4.36865200 | -0.76917000 |
| H  | -1.60090600 | -4.99048500 | -1.62587100 |
| H  | -0.78926700 | -5.01353900 | -0.05715700 |
| H  | -2.22677700 | -4.00695200 | -0.29634300 |
| C  | -2.39204100 | -1.79664100 | -2.21878100 |
| H  | -2.70654700 | -2.41104700 | -3.07397400 |
| H  | -3.02699200 | -2.05440700 | -1.36708600 |
| H  | -2.57278800 | -0.75087200 | -2.46363700 |
| C  | 0.13966600  | -0.07794700 | -3.26544800 |
| H  | 0.16206100  | -0.41038900 | -4.31214500 |
| H  | -0.76328500 | 0.51806000  | -3.12447800 |
| H  | 1.00209000  | 0.56795900  | -3.10151500 |
| C  | 2.77538600  | -1.47957300 | -2.13788400 |
| H  | 3.48668500  | -2.00726800 | -1.49790200 |
| H  | 3.04852500  | -1.68296800 | -3.18249000 |
| H  | 2.89020700  | -0.40884200 | -1.95246500 |
| Ir | 0.16315300  | -1.37983600 | -0.12457100 |
| P  | 0.54391300  | -2.07919100 | 2.12730600  |
| C  | 0.33311500  | -3.88306200 | 2.46853600  |
| H  | 0.55221700  | -4.08420100 | 3.52279300  |
| H  | -0.69592100 | -4.18845800 | 2.26114000  |
| H  | 1.01332200  | -4.47694900 | 1.85499200  |
| C  | -0.50096200 | -1.31814600 | 3.44870400  |
| H  | -0.24413800 | -1.75441100 | 4.41981800  |
| H  | -0.34081200 | -0.23910700 | 3.48382700  |
| H  | -1.55769500 | -1.50138800 | 3.23449600  |
| C  | 2.27696400  | -1.72884000 | 2.66167600  |

|   |             |             |             |
|---|-------------|-------------|-------------|
| H | 2.43375600  | -2.01905300 | 3.70657100  |
| H | 2.97338100  | -2.28609000 | 2.02839000  |
| H | 2.48579300  | -0.66210600 | 2.53946300  |
| S | -0.10454800 | 0.63911400  | 0.82081400  |
| C | -0.32947200 | 2.19976500  | -0.09003000 |
| C | 0.80961500  | 3.00803300  | -0.32829800 |
| C | -1.63804900 | 2.70518500  | -0.28503500 |
| C | 0.61158600  | 4.30181900  | -0.83143700 |
| C | -1.77566100 | 4.00808900  | -0.78655800 |
| C | -0.66641200 | 4.80015300  | -1.06813400 |
| H | 1.48228900  | 4.92537900  | -1.01153600 |
| H | -2.77720900 | 4.40315100  | -0.92919100 |
| H | -0.79781100 | 5.81095200  | -1.44316000 |
| H | 3.12416000  | 3.55888100  | -2.81492300 |
| C | 2.77863600  | 2.55607200  | -2.53182400 |
| H | 1.70398500  | 2.51966600  | -2.72018200 |
| H | 3.28559000  | 1.84082700  | -3.18868400 |
| C | 3.11737500  | 2.28867100  | -1.07080600 |
| C | 4.40914100  | 1.84856500  | -0.76043800 |
| C | 2.20321500  | 2.56460600  | -0.02299200 |
| C | 4.84136600  | 1.70882000  | 0.56292500  |
| H | 5.10297200  | 1.64378500  | -1.57100400 |
| C | 2.65339500  | 2.49936100  | 1.31792900  |
| C | 3.95716300  | 2.06152100  | 1.58563700  |
| C | 6.25526600  | 1.24594000  | 0.86809600  |
| C | 1.78450200  | 2.95385100  | 2.48234500  |
| H | 4.29946000  | 2.03255400  | 2.61577700  |
| H | 6.43799000  | 0.24512300  | 0.45859300  |
| H | 6.99016700  | 1.92741500  | 0.42385300  |
| H | 6.43240500  | 1.21232600  | 1.94693500  |
| H | 1.15564800  | 2.13622800  | 2.85609700  |
| H | 2.41658300  | 3.29967900  | 3.30625400  |
| H | 1.12446900  | 3.77510400  | 2.18952200  |
| H | -6.27342100 | -1.18071000 | 1.51436400  |
| C | -6.51805900 | -0.19096300 | 1.10825000  |
| H | -7.16080100 | -0.33185100 | 0.23425900  |
| H | -7.08930800 | 0.35062900  | 1.87001600  |
| C | -5.25554200 | 0.56801600  | 0.73900900  |
| C | -4.43995500 | 1.12026700  | 1.73347300  |
| C | -4.89309800 | 0.76277300  | -0.59565400 |
| C | -3.26949400 | 1.81829100  | 1.42259100  |
| H | -4.73956200 | 1.03518700  | 2.77357400  |
| C | -3.72830000 | 1.45739700  | -0.94865200 |
| H | -5.54282800 | 0.39095100  | -1.38205900 |

|   |             |            |             |
|---|-------------|------------|-------------|
| C | -2.87739100 | 1.94899900 | 0.06659700  |
| C | -2.49571200 | 2.50515400 | 2.53824800  |
| C | -3.46219800 | 1.74115200 | -2.42025900 |
| H | -2.42357000 | 3.58268800 | 2.34975100  |
| H | -3.00572300 | 2.36014200 | 3.49505400  |
| H | -1.47725200 | 2.11384100 | 2.62869800  |
| H | -3.75539300 | 2.76814400 | -2.67133600 |
| H | -2.40290300 | 1.64157200 | -2.67296500 |
| H | -4.04689000 | 1.06815000 | -3.05567500 |

### TS1-a

|    |             |             |             |
|----|-------------|-------------|-------------|
| C  | -0.59347200 | -3.11724400 | -1.28366500 |
| C  | -1.94630400 | -2.67022900 | -1.42203200 |
| C  | -1.90986400 | -1.36527800 | -2.06887200 |
| C  | -0.55168600 | -0.99921300 | -2.30656900 |
| C  | 0.29313500  | -2.05153200 | -1.74812500 |
| C  | -0.13614800 | -4.49188900 | -0.89930000 |
| H  | 0.10817000  | -5.04955200 | -1.81310300 |
| H  | 0.76751100  | -4.47452900 | -0.28455600 |
| H  | -0.90939300 | -5.05580800 | -0.37384600 |
| C  | -3.18633800 | -3.46510200 | -1.13014700 |
| H  | -3.52713500 | -3.98952200 | -2.03245600 |
| H  | -3.00977900 | -4.21833800 | -0.35854200 |
| H  | -4.00683300 | -2.82774100 | -0.79040900 |
| C  | -3.11094200 | -0.56388700 | -2.46899400 |
| H  | -3.21084700 | -0.56660500 | -3.56197700 |
| H  | -4.03062200 | -0.97844300 | -2.05079300 |
| H  | -3.02555900 | 0.47156400  | -2.13570200 |
| C  | -0.07005700 | 0.18487700  | -3.08926400 |
| H  | 0.59157100  | -0.14629800 | -3.89806200 |
| H  | -0.90690100 | 0.72068900  | -3.54066100 |
| H  | 0.48663100  | 0.88918600  | -2.46614400 |
| C  | 1.78123500  | -2.14485500 | -1.89957100 |
| H  | 2.20701600  | -2.87898300 | -1.21120700 |
| H  | 2.03309600  | -2.46084100 | -2.92145400 |
| H  | 2.26894700  | -1.18842000 | -1.70187200 |
| Ir | -0.77692200 | -1.26214700 | -0.08497800 |
| P  | -0.39340500 | -2.21853900 | 2.06215300  |
| C  | -1.27350500 | -3.80534200 | 2.43250400  |
| H  | -1.04937000 | -4.11717300 | 3.45792900  |
| H  | -2.35370600 | -3.66152900 | 2.33700300  |
| H  | -0.95889300 | -4.59909000 | 1.75257100  |
| C  | -0.90070500 | -1.16062300 | 3.49170800  |

|   |             |             |             |
|---|-------------|-------------|-------------|
| H | -0.71298400 | -1.68951800 | 4.43180700  |
| H | -0.33673300 | -0.22611100 | 3.47420800  |
| H | -1.96653100 | -0.92585200 | 3.41886100  |
| C | 1.38540300  | -2.59803900 | 2.38629900  |
| H | 1.52641800  | -2.93142600 | 3.41960800  |
| H | 1.72596900  | -3.38735900 | 1.70946300  |
| H | 1.98152100  | -1.70018300 | 2.20064500  |
| S | 0.54448800  | 0.48904900  | 0.84979400  |
| C | 0.83058900  | 2.05200500  | -0.01509600 |
| C | 2.18011800  | 2.38579600  | -0.31873100 |
| C | -0.19346100 | 3.02764500  | -0.15425300 |
| C | 2.46935200  | 3.67465900  | -0.78764200 |
| C | 0.15515300  | 4.30341200  | -0.62208900 |
| C | 1.46914300  | 4.62940700  | -0.94376600 |
| H | 3.50264400  | 3.92633200  | -1.00790200 |
| H | -0.62479200 | 5.05402300  | -0.70987700 |
| H | 1.71422100  | 5.62782500  | -1.29439800 |
| H | 4.10596600  | 2.07219100  | -2.95708100 |
| C | 3.59901000  | 1.15258400  | -2.63788300 |
| H | 2.52687300  | 1.31334600  | -2.76522600 |
| H | 3.91933500  | 0.34919700  | -3.30922900 |
| C | 3.96529100  | 0.82489400  | -1.19645000 |
| C | 5.02721800  | -0.06160100 | -0.96077500 |
| C | 3.32510100  | 1.44841500  | -0.10296300 |
| C | 5.49639200  | -0.31872000 | 0.32760300  |
| H | 5.50923800  | -0.54028400 | -1.80779300 |
| C | 3.83689400  | 1.24678200  | 1.20499200  |
| C | 4.89860900  | 0.35988100  | 1.39748100  |
| C | 6.65974000  | -1.26450500 | 0.56914200  |
| C | 3.29389300  | 2.02584800  | 2.39312700  |
| H | 5.28604100  | 0.21422900  | 2.40139700  |
| H | 6.93373600  | -1.79276400 | -0.34887800 |
| H | 7.54016600  | -0.71089100 | 0.91746600  |
| H | 6.40955300  | -2.00871600 | 1.33406800  |
| H | 2.24414500  | 1.78344600  | 2.58838100  |
| H | 3.87270500  | 1.79503100  | 3.29246400  |
| H | 3.36003800  | 3.10463100  | 2.21113000  |
| H | -5.94218100 | 1.42305900  | 1.97518300  |
| C | -5.82106800 | 2.21882900  | 1.23174100  |
| H | -6.41677900 | 1.96262800  | 0.35049000  |
| H | -6.23203800 | 3.14121300  | 1.66038300  |
| C | -4.35958200 | 2.41018100  | 0.86615700  |
| C | -3.38026200 | 2.50290200  | 1.86345400  |
| C | -3.96080900 | 2.56824000  | -0.46206300 |

|   |             |             |             |
|---|-------------|-------------|-------------|
| C | -2.03082600 | 2.71522000  | 1.55894300  |
| H | -3.67959500 | 2.45206800  | 2.90611400  |
| C | -2.61759300 | 2.77600400  | -0.81034800 |
| H | -4.71171700 | 2.56043200  | -1.24669700 |
| C | -1.62673100 | 2.79455300  | 0.20071200  |
| C | -1.05266900 | 2.98207700  | 2.69264900  |
| C | -2.28673700 | 3.07527900  | -2.26681800 |
| H | -0.63338100 | 3.99090600  | 2.59873600  |
| H | -1.56509000 | 2.91645500  | 3.65721800  |
| H | -0.22148000 | 2.27185300  | 2.68801600  |
| H | -2.23108300 | 4.15950400  | -2.42445200 |
| H | -1.32492200 | 2.65538100  | -2.56552800 |
| H | -3.06975200 | 2.69181100  | -2.92937500 |
| H | -2.57330100 | -0.59468900 | 0.85610100  |
| H | -2.32293400 | 0.12366100  | 0.75571000  |

## 2a

|    |             |             |             |
|----|-------------|-------------|-------------|
| C  | -0.58920000 | -3.33057600 | -0.58790400 |
| C  | -1.89970800 | -2.93252900 | -1.05592400 |
| C  | -1.72115200 | -1.90699500 | -2.07408700 |
| C  | -0.31939600 | -1.62241000 | -2.15561600 |
| C  | 0.37861700  | -2.52011700 | -1.24371700 |
| C  | -0.30839800 | -4.48892100 | 0.32445100  |
| H  | -0.25804300 | -5.41727800 | -0.25933600 |
| H  | 0.64585400  | -4.37903800 | 0.84449400  |
| H  | -1.09403600 | -4.62735400 | 1.07207300  |
| C  | -3.18340400 | -3.66721000 | -0.79029700 |
| H  | -3.28771200 | -4.49858000 | -1.49966700 |
| H  | -3.21625200 | -4.09298000 | 0.21483000  |
| H  | -4.05466000 | -3.01937100 | -0.91135900 |
| C  | -2.79860900 | -1.38835400 | -2.98240600 |
| H  | -2.89273100 | -2.04537500 | -3.85666800 |
| H  | -3.76998100 | -1.35980400 | -2.48317600 |
| H  | -2.57778600 | -0.38182100 | -3.34025000 |
| C  | 0.36179800  | -0.75155500 | -3.16782700 |
| H  | 0.94681100  | -1.37232800 | -3.85806900 |
| H  | -0.35754900 | -0.18646400 | -3.76173500 |
| H  | 1.04676400  | -0.04647600 | -2.69375000 |
| C  | 1.86508700  | -2.60079400 | -1.11187200 |
| H  | 2.17070800  | -3.37491100 | -0.40463300 |
| H  | 2.31232300  | -2.83943400 | -2.08472000 |
| H  | 2.29062400  | -1.64802900 | -0.77645100 |
| Ir | -1.14020400 | -1.03798300 | -0.08781500 |



|   |             |             |             |
|---|-------------|-------------|-------------|
| P | -1.47247600 | -1.20107200 | 2.24200700  |
| C | -2.92639800 | -2.24929500 | 2.69544400  |
| H | -3.03329100 | -2.28849400 | 3.78427400  |
| H | -3.83724900 | -1.82611400 | 2.26279000  |
| H | -2.79874200 | -3.26695100 | 2.31935200  |
| C | -1.78870300 | 0.37236600  | 3.13306400  |
| H | -2.06473500 | 0.15641000  | 4.17022900  |
| H | -0.88329800 | 0.97970400  | 3.10939800  |
| H | -2.58686300 | 0.92901200  | 2.63749200  |
| C | -0.06936600 | -1.98018600 | 3.15530700  |
| H | -0.27356500 | -1.96600900 | 4.23088000  |
| H | 0.06063200  | -3.01601200 | 2.83167600  |
| H | 0.85119600  | -1.42603200 | 2.95544400  |
| S | 0.80547100  | 0.25245700  | 0.63888000  |
| C | 1.20447000  | 1.76874600  | -0.28315300 |
| C | 2.59516300  | 1.95209500  | -0.52639800 |
| C | 0.28962700  | 2.79702600  | -0.62185300 |
| C | 3.02644900  | 3.12252100  | -1.16375100 |
| C | 0.77506000  | 3.93914000  | -1.27908000 |
| C | 2.12627100  | 4.10549100  | -1.56231700 |
| H | 4.09146400  | 3.25438100  | -1.33124100 |
| H | 0.06648000  | 4.72206200  | -1.53476300 |
| H | 2.47675700  | 5.00536800  | -2.05906500 |
| H | 4.62321900  | 1.11093500  | -2.90435000 |
| C | 4.07640800  | 0.25742900  | -2.48441200 |
| H | 3.02031100  | 0.40443800  | -2.71848000 |
| H | 4.42859800  | -0.64646300 | -2.99152600 |
| C | 4.31948800  | 0.15766200  | -0.98576500 |
| C | 5.28867800  | -0.74116900 | -0.52001900 |
| C | 3.63947600  | 0.98570200  | -0.06471900 |
| C | 5.63101700  | -0.81696900 | 0.83162700  |
| H | 5.79919300  | -1.37991900 | -1.23422500 |
| C | 4.01440800  | 0.95345200  | 1.30228000  |
| C | 4.99284800  | 0.05006600  | 1.72552900  |
| C | 6.70853200  | -1.77126600 | 1.31502100  |
| C | 3.41869700  | 1.92875900  | 2.30740300  |
| H | 5.27507700  | 0.03436800  | 2.77372000  |
| H | 6.88652900  | -2.56628700 | 0.58453800  |
| H | 7.65388500  | -1.23550800 | 1.46769500  |
| H | 6.42783600  | -2.23247000 | 2.26799400  |
| H | 2.33737600  | 1.79141300  | 2.41386100  |
| H | 3.87955600  | 1.78685000  | 3.28938000  |
| H | 3.59452200  | 2.96393900  | 1.99294500  |
| H | -5.52646800 | 2.99221000  | 1.87546900  |

|   |             |             |             |
|---|-------------|-------------|-------------|
| C | -5.36440500 | 3.17122000  | 0.80797500  |
| H | -5.98507300 | 2.47095900  | 0.23958000  |
| H | -5.71241200 | 4.18713300  | 0.58197800  |
| C | -3.89736600 | 3.02434100  | 0.44310300  |
| C | -2.89362500 | 3.27921200  | 1.38517600  |
| C | -3.51304000 | 2.70536700  | -0.86303700 |
| C | -1.53566300 | 3.18718100  | 1.05808100  |
| H | -3.17301600 | 3.58716400  | 2.38867500  |
| C | -2.16496500 | 2.61948300  | -1.23095000 |
| H | -4.27679400 | 2.55044300  | -1.61949200 |
| C | -1.15897800 | 2.81568500  | -0.25431900 |
| C | -0.48603900 | 3.57314000  | 2.08767600  |
| C | -1.80294000 | 2.38181500  | -2.68658500 |
| H | 0.03182000  | 4.48821200  | 1.77579800  |
| H | -0.95207100 | 3.76139100  | 3.05960600  |
| H | 0.27363000  | 2.79360000  | 2.20385400  |
| H | -1.45468000 | 3.31150600  | -3.15273900 |
| H | -0.99782000 | 1.64980900  | -2.78237100 |
| H | -2.67615400 | 2.03455800  | -3.24794100 |
| H | -2.66829200 | -0.68312000 | 0.10368600  |
| H | -1.53103000 | 0.48090200  | -0.29288800 |

### TS2-a

|   |             |             |             |
|---|-------------|-------------|-------------|
| C | -0.67455900 | -3.31440700 | -0.63694300 |
| C | -1.97114800 | -2.83646600 | -1.11939900 |
| C | -1.71491200 | -1.83297600 | -2.14232400 |
| C | -0.30766600 | -1.61158500 | -2.18551400 |
| C | 0.33617700  | -2.54493500 | -1.26038000 |
| C | -0.46888300 | -4.49240300 | 0.26967900  |
| H | -0.45359700 | -5.41774400 | -0.32112600 |
| H | 0.47968300  | -4.43260800 | 0.80903600  |
| H | -1.27418300 | -4.59510500 | 1.00209400  |
| C | -3.29011100 | -3.52744500 | -0.91880300 |
| H | -3.45236200 | -4.26144500 | -1.71917900 |
| H | -3.33027600 | -4.06771100 | 0.02942200  |
| H | -4.12478400 | -2.82200700 | -0.94141700 |
| C | -2.75265600 | -1.23751200 | -3.04828900 |
| H | -2.87877400 | -1.87303400 | -3.93487900 |
| H | -3.72338800 | -1.16370500 | -2.55221700 |
| H | -2.47239900 | -0.23870600 | -3.38626300 |
| C | 0.43718800  | -0.74650600 | -3.15941100 |
| H | 1.11285400  | -1.36452100 | -3.76349200 |
| H | -0.24326700 | -0.23554600 | -3.84310200 |

|    |             |             |             |
|----|-------------|-------------|-------------|
| H  | 1.04749200  | 0.00533100  | -2.65446900 |
| C  | 1.81763400  | -2.68206900 | -1.08991700 |
| H  | 2.07097600  | -3.32286200 | -0.24204100 |
| H  | 2.25750300  | -3.13461600 | -1.98891900 |
| H  | 2.30317100  | -1.71560100 | -0.93119800 |
| Ir | -1.11679300 | -1.08804900 | -0.09692600 |
| P  | -1.69361600 | -1.30042000 | 2.16213100  |
| C  | -3.20361500 | -2.31517900 | 2.48697100  |
| H  | -3.44277400 | -2.29215100 | 3.55535900  |
| H  | -4.04770200 | -1.91021900 | 1.92231600  |
| H  | -3.04636000 | -3.35438600 | 2.18815400  |
| C  | -2.06821200 | 0.28270500  | 3.02746000  |
| H  | -2.37068600 | 0.07994700  | 4.06008400  |
| H  | -1.17835000 | 0.91529600  | 3.02780000  |
| H  | -2.86471900 | 0.81649600  | 2.50402200  |
| C  | -0.40181500 | -2.08191300 | 3.22989000  |
| H  | -0.74392400 | -2.13216400 | 4.26911200  |
| H  | -0.18222300 | -3.09377600 | 2.87903500  |
| H  | 0.51660100  | -1.48972600 | 3.18364900  |
| S  | 0.72939900  | 0.43673200  | 0.76622400  |
| C  | 1.28909500  | 1.84928600  | -0.23605200 |
| C  | 2.68430300  | 1.92239700  | -0.48349900 |
| C  | 0.43220000  | 2.92030700  | -0.58776600 |
| C  | 3.18266000  | 3.05487300  | -1.14372200 |
| C  | 0.98314900  | 4.01985500  | -1.26052700 |
| C  | 2.34395400  | 4.08936000  | -1.54674200 |
| H  | 4.25175200  | 3.11675300  | -1.32335000 |
| H  | 0.32609900  | 4.84158800  | -1.53046800 |
| H  | 2.75162900  | 4.95739700  | -2.05644500 |
| H  | 4.80242200  | 0.87624100  | -2.85579800 |
| C  | 4.09782200  | 0.14959000  | -2.43120000 |
| H  | 3.09095900  | 0.48753200  | -2.68190900 |
| H  | 4.28046500  | -0.81236000 | -2.92100800 |
| C  | 4.30502400  | 0.03245800  | -0.92768200 |
| C  | 5.21754000  | -0.91966800 | -0.45180700 |
| C  | 3.65901600  | 0.89278500  | -0.01195400 |
| C  | 5.53485800  | -1.02043800 | 0.90345900  |
| H  | 5.70294200  | -1.58195300 | -1.16199000 |
| C  | 4.01458000  | 0.83669600  | 1.36105100  |
| C  | 4.93315600  | -0.12235800 | 1.79315400  |
| C  | 6.54518600  | -2.03829000 | 1.40167500  |
| C  | 3.46879900  | 1.84462000  | 2.36394100  |
| H  | 5.20131800  | -0.15650000 | 2.84452900  |
| H  | 6.77631100  | -2.77486600 | 0.62656400  |

|   |             |             |             |
|---|-------------|-------------|-------------|
| H | 7.48084300  | -1.54194200 | 1.68737200  |
| H | 6.16626100  | -2.56945100 | 2.28189900  |
| H | 2.38630700  | 1.74510200  | 2.50092300  |
| H | 3.94598700  | 1.70093200  | 3.33764000  |
| H | 3.66981300  | 2.86949400  | 2.03212500  |
| H | -5.41666900 | 3.19652600  | 1.82062600  |
| C | -5.23491500 | 3.36420000  | 0.75447700  |
| H | -5.85196600 | 2.66451500  | 0.18150500  |
| H | -5.56963900 | 4.38117500  | 0.51344900  |
| C | -3.76347500 | 3.20117900  | 0.41601200  |
| C | -2.77414700 | 3.45130500  | 1.37360000  |
| C | -3.36109500 | 2.86447800  | -0.88104200 |
| C | -1.41187200 | 3.34896100  | 1.06870300  |
| H | -3.06691700 | 3.76003000  | 2.37258100  |
| C | -2.00927400 | 2.76457500  | -1.22742100 |
| H | -4.11453500 | 2.70281700  | -1.64609800 |
| C | -1.01934400 | 2.97169300  | -0.23825900 |
| C | -0.37760600 | 3.71472400  | 2.12070100  |
| C | -1.62732900 | 2.48282100  | -2.67060600 |
| H | 0.19857500  | 4.59209100  | 1.80358500  |
| H | -0.86594600 | 3.95331500  | 3.07013200  |
| H | 0.33251600  | 2.89791900  | 2.28866300  |
| H | -1.22189300 | 3.38302100  | -3.14789900 |
| H | -0.86223900 | 1.70511100  | -2.73731600 |
| H | -2.50606200 | 2.16834000  | -3.24227300 |
| H | -2.40475800 | -0.15964100 | -0.05146200 |
| H | -0.81343200 | 0.58741000  | 0.14532300  |

#### 4a

|   |             |             |             |
|---|-------------|-------------|-------------|
| C | -1.09679500 | -3.42895300 | 0.75744500  |
| C | 0.26765400  | -3.56207200 | 0.29551200  |
| C | 1.06447400  | -2.59225700 | 0.99151600  |
| C | 0.19675900  | -1.92062200 | 1.95171600  |
| C | -1.12015800 | -2.43508200 | 1.82617300  |
| C | -2.21308800 | -4.38697600 | 0.45749200  |
| H | -2.22629900 | -5.18569800 | 1.21119200  |
| H | -3.19286200 | -3.90158100 | 0.48503100  |
| H | -2.09166200 | -4.86190000 | -0.51905700 |
| C | 0.76911600  | -4.59810700 | -0.66839700 |
| H | 1.04424400  | -5.51075000 | -0.12341500 |
| H | 0.00860500  | -4.86642200 | -1.40577200 |
| H | 1.65302900  | -4.25197800 | -1.20900200 |
| C | 2.55767600  | -2.46358700 | 0.92302700  |

|    |             |             |             |
|----|-------------|-------------|-------------|
| H  | 3.03041700  | -3.03434100 | 1.73444200  |
| H  | 2.94753400  | -2.85235900 | -0.02148100 |
| H  | 2.88956800  | -1.42826900 | 1.00710300  |
| C  | 0.67820200  | -0.93493600 | 2.97463700  |
| H  | 1.43810500  | -1.40353800 | 3.61227200  |
| H  | 1.13517700  | -0.05739600 | 2.51044000  |
| H  | -0.13233200 | -0.59451800 | 3.62160600  |
| C  | -2.28936500 | -2.16766100 | 2.72882400  |
| H  | -3.24037100 | -2.24830200 | 2.19610100  |
| H  | -2.31310500 | -2.90055300 | 3.54707200  |
| H  | -2.24471700 | -1.17233400 | 3.17528700  |
| Ir | -0.50321200 | -1.54279200 | -0.24866000 |
| P  | -2.46421100 | -1.07612200 | -1.42972600 |
| C  | -2.95086900 | -2.47392400 | -2.54420200 |
| H  | -3.84799200 | -2.21257500 | -3.11579700 |
| H  | -2.13274200 | -2.68525000 | -3.23852300 |
| H  | -3.15660200 | -3.37696900 | -1.96549600 |
| C  | -2.42169300 | 0.33920600  | -2.61342400 |
| H  | -3.33807700 | 0.34226900  | -3.21321600 |
| H  | -2.35265900 | 1.28293700  | -2.06981200 |
| H  | -1.55941800 | 0.24191700  | -3.27880700 |
| C  | -4.00888600 | -0.75860800 | -0.46592200 |
| H  | -4.86029900 | -0.63084200 | -1.14379000 |
| H  | -4.21982000 | -1.59566400 | 0.20522500  |
| H  | -3.88099900 | 0.15248900  | 0.12381600  |
| S  | 0.45053900  | 0.64710700  | -0.82741400 |
| C  | 0.93792700  | 1.98585800  | 0.32687500  |
| C  | -0.06243500 | 2.86009700  | 0.80097200  |
| C  | 2.31348800  | 2.23706600  | 0.57454200  |
| C  | 0.32848000  | 3.93325700  | 1.61683700  |
| C  | 2.64255000  | 3.33554500  | 1.38242000  |
| C  | 1.66526900  | 4.16631200  | 1.92080900  |
| H  | -0.44122800 | 4.60812800  | 1.97923000  |
| H  | 3.69276200  | 3.54050100  | 1.56504400  |
| H  | 1.94681300  | 5.01120800  | 2.54214600  |
| H  | -1.58054600 | 2.58146400  | 3.31274100  |
| C  | -2.06883300 | 1.81190100  | 2.70399100  |
| H  | -1.36269700 | 0.98477500  | 2.58722200  |
| H  | -2.94483900 | 1.45085800  | 3.25135100  |
| C  | -2.48022100 | 2.36645300  | 1.35133800  |
| C  | -3.83782500 | 2.48977400  | 1.03803700  |
| C  | -1.50774900 | 2.80455700  | 0.42169300  |
| C  | -4.26420500 | 3.05129500  | -0.17279400 |
| H  | -4.57769900 | 2.16824500  | 1.76557100  |

|   |             |             |             |
|---|-------------|-------------|-------------|
| C | -1.92454200 | 3.39707400  | -0.79422300 |
| C | -3.29460200 | 3.49695300  | -1.07424100 |
| C | -5.74480100 | 3.20534600  | -0.47075000 |
| C | -0.91937300 | 3.98557700  | -1.77205800 |
| H | -3.60694200 | 3.96101500  | -2.00430700 |
| H | -6.27430700 | 2.25407000  | -0.34264100 |
| H | -6.19897500 | 3.93438200  | 0.21106200  |
| H | -5.90549600 | 3.55385500  | -1.49489200 |
| H | -0.20914200 | 3.23021900  | -2.12470700 |
| H | -1.43506300 | 4.40311800  | -2.64139400 |
| H | -0.34305500 | 4.78850400  | -1.29787200 |
| H | 6.39106900  | -1.37935400 | -2.61827800 |
| C | 6.74603000  | -0.74726300 | -1.79615500 |
| H | 7.23770600  | -1.38698300 | -1.05789000 |
| H | 7.49527400  | -0.05789500 | -2.20321000 |
| C | 5.59737000  | 0.02290500  | -1.17148900 |
| C | 4.79348400  | 0.85890600  | -1.95624300 |
| C | 5.33892300  | -0.04504100 | 0.19832400  |
| C | 3.73518200  | 1.58839000  | -1.40882200 |
| H | 5.01444200  | 0.96875100  | -3.01320100 |
| C | 4.28506000  | 0.66518600  | 0.79029700  |
| H | 5.97966000  | -0.65280900 | 0.82933500  |
| C | 3.43636200  | 1.45278400  | -0.02317600 |
| C | 2.99263000  | 2.58606100  | -2.28755600 |
| C | 4.14609500  | 0.61744300  | 2.30586300  |
| H | 3.06704100  | 3.59467600  | -1.86502600 |
| H | 3.43218900  | 2.60124900  | -3.28868200 |
| H | 1.92843000  | 2.34886800  | -2.39198700 |
| H | 4.69635700  | 1.45060100  | 2.76169300  |
| H | 3.10743500  | 0.69646800  | 2.63140700  |
| H | 4.56978200  | -0.31141400 | 2.70022700  |
| H | 0.00583800  | -1.74605600 | -1.74601400 |
| H | 1.73659300  | 0.28115000  | -1.05436400 |

## 1b

|   |             |            |             |
|---|-------------|------------|-------------|
| C | -0.91083300 | 3.34724000 | -1.25770800 |
| C | 0.51649600  | 3.38571600 | -1.21178600 |
| C | 1.01713100  | 2.21330500 | -1.90947400 |
| C | -0.10064100 | 1.45459900 | -2.38223100 |
| C | -1.29813700 | 2.13162800 | -1.93938100 |
| C | -1.85930000 | 4.42840200 | -0.83230200 |
| H | -2.23521200 | 4.95645300 | -1.71879600 |
| H | -2.72947400 | 4.03270600 | -0.29934200 |

|   |             |             |             |
|---|-------------|-------------|-------------|
| H | -1.37335800 | 5.17169400  | -0.19655300 |
| C | 1.37909100  | 4.49492000  | -0.69061000 |
| H | 1.69676400  | 5.14424500  | -1.51800400 |
| H | 0.85014600  | 5.12046000  | 0.03197700  |
| H | 2.28487400  | 4.10972100  | -0.21258600 |
| C | 2.46126200  | 1.92834600  | -2.16709700 |
| H | 2.80928400  | 2.53737600  | -3.01415500 |
| H | 3.08432200  | 2.17454900  | -1.30266100 |
| H | 2.62824400  | 0.87929000  | -2.40998800 |
| C | -0.04865800 | 0.27517500  | -3.30311800 |
| H | 0.20238500  | 0.60646400  | -4.31986800 |
| H | 0.70500500  | -0.45274500 | -2.99561800 |
| H | -1.01138000 | -0.23460200 | -3.34728900 |
| C | -2.70161900 | 1.70083900  | -2.22862600 |
| H | -3.42530100 | 2.27843400  | -1.64835300 |
| H | -2.92896500 | 1.85120300  | -3.29332100 |
| H | -2.85086500 | 0.64297300  | -1.99514500 |
| P | -0.59692100 | 2.18911100  | 2.15381100  |
| C | -0.47013000 | 3.99599300  | 2.54067400  |
| H | -0.70567000 | 4.17071700  | 3.59614900  |
| H | 0.54735000  | 4.34809600  | 2.34711700  |
| H | -1.16840900 | 4.57103900  | 1.92885200  |
| C | 0.47797200  | 1.44528700  | 3.46322300  |
| H | 0.17844400  | 1.81379100  | 4.45024100  |
| H | 0.39636600  | 0.35683600  | 3.44137800  |
| H | 1.52153500  | 1.71469500  | 3.27548900  |
| C | -2.31910800 | 1.75054100  | 2.66809100  |
| H | -2.48889200 | 1.98724400  | 3.72427000  |
| H | -3.03641800 | 2.30890700  | 2.05809300  |
| H | -2.48679200 | 0.68341800  | 2.49535800  |
| S | 0.06570600  | -0.52566900 | 0.78322900  |
| C | 0.28230400  | -2.09193300 | -0.10185000 |
| C | -0.86566800 | -2.88281900 | -0.35874900 |
| C | 1.58478100  | -2.61797800 | -0.28681800 |
| C | -0.68397300 | -4.17897000 | -0.85919900 |
| C | 1.70736700  | -3.92345300 | -0.78511600 |
| C | 0.58913900  | -4.69804400 | -1.08027500 |
| H | -1.56282000 | -4.78665200 | -1.05429500 |
| H | 2.70417900  | -4.33397300 | -0.91728800 |
| H | 0.70903700  | -5.70987200 | -1.45638000 |
| H | -3.05528900 | -3.28635600 | -2.90208400 |
| C | -2.76050000 | -2.27869000 | -2.58149100 |
| H | -1.68506900 | -2.18822600 | -2.74521500 |
| H | -3.28653400 | -1.56607500 | -3.22622700 |

|    |             |             |             |
|----|-------------|-------------|-------------|
| C  | -3.13462200 | -2.07027000 | -1.12042200 |
| C  | -4.42625100 | -1.61384700 | -0.81759400 |
| C  | -2.25394000 | -2.41223700 | -0.07017900 |
| C  | -4.88214100 | -1.52245000 | 0.49837200  |
| H  | -5.09671500 | -1.35535000 | -1.63196300 |
| C  | -2.72878100 | -2.38942200 | 1.26700600  |
| C  | -4.02399300 | -1.93361100 | 1.52708000  |
| C  | -6.29554300 | -1.06248600 | 0.81013000  |
| C  | -1.88705100 | -2.93526500 | 2.41096100  |
| H  | -4.38486600 | -1.93198800 | 2.55134200  |
| H  | -6.75979900 | -0.59727700 | -0.06454700 |
| H  | -6.91811400 | -1.91465600 | 1.10961400  |
| H  | -6.30323300 | -0.33848900 | 1.63250100  |
| H  | -0.96146200 | -2.36621500 | 2.54506100  |
| H  | -2.45245400 | -2.89872800 | 3.34699700  |
| H  | -1.61134900 | -3.97867500 | 2.21913100  |
| H  | 6.34600100  | 0.87619900  | 1.98201800  |
| C  | 6.50214000  | 0.19979400  | 1.13469800  |
| H  | 6.88942200  | 0.78222400  | 0.29321600  |
| H  | 7.27155100  | -0.52692100 | 1.42420200  |
| C  | 5.21485000  | -0.51327700 | 0.75964900  |
| C  | 4.38592600  | -1.05403200 | 1.74932400  |
| C  | 4.85942600  | -0.70527000 | -0.57741700 |
| C  | 3.21222700  | -1.74338000 | 1.43150700  |
| H  | 4.67501100  | -0.96243400 | 2.79190600  |
| C  | 3.69204700  | -1.39162600 | -0.93712800 |
| H  | 5.51515400  | -0.33530000 | -1.35991400 |
| C  | 2.83035600  | -1.87609700 | 0.07260700  |
| C  | 2.42066100  | -2.41499800 | 2.54353700  |
| C  | 3.42661200  | -1.66677300 | -2.41043100 |
| H  | 2.35485300  | -3.49541200 | 2.36949600  |
| H  | 2.91279500  | -2.25421000 | 3.50726800  |
| H  | 1.39943600  | -2.02598400 | 2.60966800  |
| H  | 3.68700300  | -2.70250900 | -2.66103900 |
| H  | 2.37277900  | -1.53227800 | -2.66899600 |
| H  | 4.03582700  | -1.01199200 | -3.04187000 |
| Rh | -0.15133700 | 1.52429100  | -0.14168500 |

### TS1-b

|   |             |             |             |
|---|-------------|-------------|-------------|
| C | -0.44526500 | -3.32863600 | -1.10381800 |
| C | -1.76939000 | -2.97368000 | -1.49190100 |
| C | -1.68384100 | -1.73673200 | -2.25038600 |
| C | -0.32147500 | -1.32397000 | -2.32022200 |



|   |             |             |             |
|---|-------------|-------------|-------------|
| C | 0.46031300  | -2.27237000 | -1.54854200 |
| C | 0.00206400  | -4.63055500 | -0.51263100 |
| H | 0.39227100  | -5.26937300 | -1.31670000 |
| H | 0.81066900  | -4.50401800 | 0.21229300  |
| H | -0.81638700 | -5.17506700 | -0.03767800 |
| C | -3.01327500 | -3.79618000 | -1.32072700 |
| H | -3.21894500 | -4.37482000 | -2.23129500 |
| H | -2.92069200 | -4.50705800 | -0.49580900 |
| H | -3.89076100 | -3.17195700 | -1.12901200 |
| C | -2.84949200 | -1.07245700 | -2.91265900 |
| H | -3.01148100 | -1.52119100 | -3.90271600 |
| H | -3.77109000 | -1.20566300 | -2.34028200 |
| H | -2.68565100 | -0.00345500 | -3.05078500 |
| C | 0.23648300  | -0.19310700 | -3.12981100 |
| H | 1.03315200  | -0.55911000 | -3.78749300 |
| H | -0.53152700 | 0.25973000  | -3.76005800 |
| H | 0.66247100  | 0.58830000  | -2.49537500 |
| C | 1.95406600  | -2.30902000 | -1.45855500 |
| H | 2.29062200  | -2.88048100 | -0.58987800 |
| H | 2.36509000  | -2.79630500 | -2.35479800 |
| H | 2.38613100  | -1.31025900 | -1.37898300 |
| P | -0.85541300 | -2.12986300 | 2.16209100  |
| C | -1.80346000 | -3.68308600 | 2.51335600  |
| H | -1.81351600 | -3.87685400 | 3.59133200  |
| H | -2.83420200 | -3.57421600 | 2.16377600  |
| H | -1.34879200 | -4.53968600 | 2.01184300  |
| C | -1.60310300 | -0.93781800 | 3.36130700  |
| H | -1.56434600 | -1.35156000 | 4.37464600  |
| H | -1.05218900 | 0.00362400  | 3.32225000  |
| H | -2.64432600 | -0.74013400 | 3.09141700  |
| C | 0.82526500  | -2.46332100 | 2.85214200  |
| H | 0.75715800  | -2.75356200 | 3.90581100  |
| H | 1.30669200  | -3.26928400 | 2.29107800  |
| H | 1.43745800  | -1.56245200 | 2.75655100  |
| S | 0.42385900  | 0.40029000  | 0.82900000  |
| C | 0.75611600  | 1.91487800  | -0.08751600 |
| C | 2.11309500  | 2.24421700  | -0.36689300 |
| C | -0.26928000 | 2.87308600  | -0.31495800 |
| C | 2.40396400  | 3.50645400  | -0.90261300 |
| C | 0.07974000  | 4.12114900  | -0.84979100 |
| C | 1.40101000  | 4.43901600  | -1.15192800 |
| H | 3.44169400  | 3.75620000  | -1.10312600 |
| H | -0.70407700 | 4.85738400  | -1.00255400 |
| H | 1.64990500  | 5.41617500  | -1.55579600 |

|    |             |             |             |
|----|-------------|-------------|-------------|
| H  | 4.29272700  | 1.84595300  | -2.90330900 |
| C  | 3.71285700  | 0.97616400  | -2.56767900 |
| H  | 2.66184500  | 1.19268500  | -2.76132400 |
| H  | 4.01841700  | 0.12166500  | -3.18116000 |
| C  | 3.98763700  | 0.70589200  | -1.09391500 |
| C  | 5.06194400  | -0.13721100 | -0.76853200 |
| C  | 3.26132400  | 1.33745400  | -0.05932900 |
| C  | 5.46348100  | -0.33893800 | 0.55130500  |
| H  | 5.60853900  | -0.62316300 | -1.57119900 |
| C  | 3.70568200  | 1.19464800  | 1.28119700  |
| C  | 4.78369400  | 0.35338000  | 1.56206400  |
| C  | 6.64349000  | -1.23318800 | 0.88854800  |
| C  | 3.08144100  | 2.00325800  | 2.40792800  |
| H  | 5.11918200  | 0.25556200  | 2.59006100  |
| H  | 6.96814100  | -1.80236800 | 0.01242000  |
| H  | 7.49338100  | -0.63358300 | 1.23697700  |
| H  | 6.38574300  | -1.94101100 | 1.68459900  |
| H  | 2.04040600  | 1.71185600  | 2.58288900  |
| H  | 3.64154100  | 1.85199000  | 3.33549700  |
| H  | 3.09474600  | 3.07324700  | 2.17074000  |
| H  | -6.04551100 | 1.41420300  | 1.83332000  |
| C  | -5.90652200 | 2.20621400  | 1.08815400  |
| H  | -6.51201100 | 1.96289100  | 0.21010000  |
| H  | -6.29144500 | 3.13901100  | 1.51746100  |
| C  | -4.44173700 | 2.35644300  | 0.71636900  |
| C  | -3.47501500 | 2.57207400  | 1.70734700  |
| C  | -4.02655300 | 2.33841800  | -0.61637300 |
| C  | -2.12280000 | 2.73954500  | 1.39541900  |
| H  | -3.78717900 | 2.64893700  | 2.74471500  |
| C  | -2.67895100 | 2.50254100  | -0.97002300 |
| H  | -4.76709100 | 2.22582300  | -1.40251600 |
| C  | -1.70403000 | 2.65610000  | 0.04244800  |
| C  | -1.14315200 | 3.09820800  | 2.50034900  |
| C  | -2.31527200 | 2.60990300  | -2.44406400 |
| H  | -0.64705200 | 4.05032400  | 2.27903200  |
| H  | -1.66772400 | 3.20087300  | 3.45502000  |
| H  | -0.36482000 | 2.33571800  | 2.60764700  |
| H  | -2.14084800 | 3.65743700  | -2.71819200 |
| H  | -1.40157200 | 2.05962400  | -2.68177200 |
| H  | -3.13478800 | 2.24151200  | -3.06970500 |
| H  | -2.84477600 | -0.61320200 | 0.46394800  |
| H  | -2.64681700 | 0.09668200  | 0.28577100  |
| Rh | -0.86478300 | -1.37282000 | -0.11901000 |

### 3b

|   |             |             |             |
|---|-------------|-------------|-------------|
| C | -1.11261600 | -3.25842500 | -0.80815600 |
| C | -2.37795400 | -2.70901400 | -1.22976400 |
| C | -2.09390700 | -1.64535200 | -2.16322000 |
| C | -0.67258600 | -1.51286200 | -2.28941600 |
| C | -0.05910500 | -2.50690600 | -1.43712700 |
| C | -0.91953700 | -4.53179400 | -0.04012100 |
| H | -0.83705700 | -5.36648800 | -0.74958400 |
| H | -0.00176000 | -4.52435100 | 0.55247800  |
| H | -1.76118600 | -4.75617900 | 0.61904800  |
| C | -3.73704600 | -3.28951800 | -0.96390900 |
| H | -4.00419300 | -4.00747400 | -1.75138100 |
| H | -3.77710000 | -3.82291100 | -0.01115700 |
| H | -4.51253100 | -2.51837600 | -0.94979500 |
| C | -3.13169500 | -0.88459500 | -2.93162400 |
| H | -3.43757900 | -1.46591200 | -3.81205200 |
| H | -4.02788200 | -0.70272200 | -2.33205600 |
| H | -2.75596400 | 0.07778600  | -3.28244800 |
| C | 0.07381400  | -0.64954500 | -3.25910900 |
| H | 0.53431800  | -1.27430400 | -4.03593400 |
| H | -0.58314300 | 0.06501800  | -3.75754500 |
| H | 0.87445600  | -0.09477100 | -2.76520600 |
| C | 1.40885300  | -2.79076500 | -1.36419900 |
| H | 1.64500000  | -3.50982400 | -0.57592700 |
| H | 1.74992400  | -3.21749200 | -2.31734300 |
| H | 1.98755700  | -1.88316800 | -1.16900600 |
| P | -1.42542400 | -1.54873400 | 2.21803200  |
| C | -2.84796100 | -2.63815800 | 2.69129000  |
| H | -2.87541400 | -2.76361900 | 3.77919200  |
| H | -3.78819000 | -2.18459000 | 2.36427300  |
| H | -2.75325500 | -3.62398900 | 2.23146700  |
| C | -1.67567800 | -0.08156100 | 3.30448000  |
| H | -1.86316400 | -0.41370600 | 4.33115000  |
| H | -0.77884300 | 0.53870300  | 3.27624900  |
| H | -2.52026700 | 0.51304400  | 2.94863800  |
| C | 0.04714900  | -2.38416100 | 2.95846700  |
| H | -0.08784700 | -2.49483100 | 4.03978600  |
| H | 0.18697200  | -3.37376000 | 2.51730800  |
| H | 0.93802100  | -1.78029700 | 2.76464200  |
| S | 0.78615000  | 0.11507900  | 0.58924900  |
| C | 1.20682500  | 1.70474900  | -0.16922700 |

|   |             |             |             |
|---|-------------|-------------|-------------|
| C | 2.60012400  | 1.88291000  | -0.40417300 |
| C | 0.31858300  | 2.78648300  | -0.39940500 |
| C | 3.06125100  | 3.10903600  | -0.89774700 |
| C | 0.83090700  | 3.98917000  | -0.91049400 |
| C | 2.18720800  | 4.15796200  | -1.16758300 |
| H | 4.12920000  | 3.23131100  | -1.05525200 |
| H | 0.14185500  | 4.81306700  | -1.07502100 |
| H | 2.56086700  | 5.10356900  | -1.54904100 |
| H | 4.30865200  | 1.26514100  | -2.89460300 |
| C | 3.89572600  | 0.30640900  | -2.55909100 |
| H | 2.81754700  | 0.34022800  | -2.73562800 |
| H | 4.32695400  | -0.48408800 | -3.18079100 |
| C | 4.21587000  | 0.06448700  | -1.09216700 |
| C | 5.16238100  | -0.91040900 | -0.75122600 |
| C | 3.61434900  | 0.83509900  | -0.07279100 |
| C | 5.55320400  | -1.12172700 | 0.57322400  |
| H | 5.61650000  | -1.50189300 | -1.54023900 |
| C | 4.03376500  | 0.66031200  | 1.26870500  |
| C | 4.98625400  | -0.31740800 | 1.56815500  |
| C | 6.60708800  | -2.15727100 | 0.92369900  |
| C | 3.50421200  | 1.55450100  | 2.38007200  |
| H | 5.30471600  | -0.44333000 | 2.59847900  |
| H | 6.74888500  | -2.86758200 | 0.10351400  |
| H | 7.57129300  | -1.67170300 | 1.11993300  |
| H | 6.32598400  | -2.71756900 | 1.82213000  |
| H | 2.41888100  | 1.45622900  | 2.49095000  |
| H | 3.97262400  | 1.29145100  | 3.33315900  |
| H | 3.72509200  | 2.60705000  | 2.16840500  |
| H | -5.58009700 | 2.40302700  | 1.87433300  |
| C | -5.37998000 | 2.85779200  | 0.89874700  |
| H | -5.98026900 | 2.34085000  | 0.14352800  |
| H | -5.71927000 | 3.90052200  | 0.94043000  |
| C | -3.90100500 | 2.80246000  | 0.55807100  |
| C | -2.93020000 | 2.92853900  | 1.56112900  |
| C | -3.47257200 | 2.71016300  | -0.77014500 |
| C | -1.56223300 | 2.92684700  | 1.26643900  |
| H | -3.24694700 | 3.07059000  | 2.59051100  |
| C | -2.11176700 | 2.71148700  | -1.10416100 |
| H | -4.21100500 | 2.66562300  | -1.56512600 |
| C | -1.13890100 | 2.76564400  | -0.07558600 |
| C | -0.55037600 | 3.18938200  | 2.36922000  |
| C | -1.70312800 | 2.71238900  | -2.56786700 |
| H | -0.07063400 | 4.16302200  | 2.21184100  |
| H | -1.04119600 | 3.20699200  | 3.34699600  |

|    |             |             |             |
|----|-------------|-------------|-------------|
| H  | 0.23954900  | 2.43257300  | 2.37919000  |
| H  | -1.34405500 | 3.70548800  | -2.86231300 |
| H  | -0.89018900 | 2.00790700  | -2.76119500 |
| H  | -2.55720000 | 2.46555600  | -3.20652000 |
| H  | -2.44672900 | 0.08515400  | 0.26080900  |
| H  | -1.80447500 | 0.56320500  | -0.01975300 |
| Rh | -1.23645200 | -1.09014400 | -0.10916300 |

### TS2-b

|   |             |             |             |
|---|-------------|-------------|-------------|
| C | -0.48867000 | -3.48903600 | -0.57637500 |
| C | -1.78310600 | -3.14439500 | -1.16273500 |
| C | -1.55138300 | -2.16302900 | -2.18806300 |
| C | -0.15863800 | -1.83886600 | -2.18022200 |
| C | 0.50186200  | -2.68473300 | -1.19614000 |
| C | -0.23775500 | -4.62262200 | 0.37544400  |
| H | -0.06664000 | -5.54949700 | -0.18818000 |
| H | 0.64741400  | -4.44977500 | 0.99273800  |
| H | -1.08749600 | -4.80655600 | 1.03824000  |
| C | -3.06310000 | -3.90478500 | -0.97627500 |
| H | -3.13091600 | -4.70510300 | -1.72599600 |
| H | -3.12425600 | -4.37806600 | 0.00522600  |
| H | -3.94151100 | -3.26575400 | -1.10195100 |
| C | -2.58525700 | -1.64853500 | -3.14553700 |
| H | -2.64667300 | -2.31313100 | -4.01788300 |
| H | -3.57759000 | -1.61312300 | -2.68867400 |
| H | -2.34430000 | -0.64777700 | -3.50869200 |
| C | 0.55641700  | -0.96757800 | -3.16630600 |
| H | 1.00028600  | -1.58858300 | -3.95662500 |
| H | -0.11775700 | -0.25688300 | -3.64802900 |
| H | 1.36690400  | -0.40902800 | -2.69695500 |
| C | 1.97867200  | -2.71889600 | -0.95000600 |
| H | 2.22532000  | -3.27320300 | -0.04141800 |
| H | 2.48476300  | -3.21679000 | -1.78851500 |
| H | 2.40490800  | -1.71709800 | -0.85114800 |
| P | -1.79042100 | -1.53907900 | 2.10753100  |
| C | -3.19737300 | -2.70827200 | 2.38982100  |
| H | -3.53216600 | -2.63731800 | 3.43018500  |
| H | -4.03110200 | -2.45505500 | 1.72952800  |
| H | -2.89239000 | -3.73925700 | 2.19497400  |
| C | -2.40214100 | 0.01884900  | 2.88462000  |
| H | -2.74542200 | -0.18308000 | 3.90479300  |
| H | -1.59405800 | 0.75245500  | 2.91025900  |
| H | -3.22206300 | 0.43747400  | 2.29601800  |

|   |             |             |             |
|---|-------------|-------------|-------------|
| C | -0.48958900 | -2.12546800 | 3.28451700  |
| H | -0.88908500 | -2.18336000 | 4.30280200  |
| H | -0.12920100 | -3.11366700 | 2.98683900  |
| H | 0.35246700  | -1.42776300 | 3.26752600  |
| S | 0.52038500  | 0.46763500  | 0.81662100  |
| C | 1.03146700  | 1.88522500  | -0.18868500 |
| C | 2.42342800  | 2.05727700  | -0.41454300 |
| C | 0.11162800  | 2.89623600  | -0.56555700 |
| C | 2.85457400  | 3.22817100  | -1.05520600 |
| C | 0.59595600  | 4.03559500  | -1.22169800 |
| C | 1.95528800  | 4.20485000  | -1.47134600 |
| H | 3.91993000  | 3.36421000  | -1.21525600 |
| H | -0.11234100 | 4.80736500  | -1.50915300 |
| H | 2.31291000  | 5.10284400  | -1.96661600 |
| H | 4.77551400  | 1.12968400  | -2.80262800 |
| C | 3.99633900  | 0.46615200  | -2.40546300 |
| H | 3.03238400  | 0.90953400  | -2.66233200 |
| H | 4.09461300  | -0.49742300 | -2.91688700 |
| C | 4.17364200  | 0.30123000  | -0.90155000 |
| C | 5.13244500  | -0.61630100 | -0.44779400 |
| C | 3.46035000  | 1.08157200  | 0.03681400  |
| C | 5.43511700  | -0.75257100 | 0.90761400  |
| H | 5.66798700  | -1.21899300 | -1.17541500 |
| C | 3.80120100  | 0.99336500  | 1.41124600  |
| C | 4.77036600  | 0.07475700  | 1.82061200  |
| C | 6.50398000  | -1.72303600 | 1.37771500  |
| C | 3.18606500  | 1.93013500  | 2.44158600  |
| H | 5.02709400  | 0.01667900  | 2.87375300  |
| H | 6.67042900  | -2.51340900 | 0.63934200  |
| H | 7.45583200  | -1.19872300 | 1.53027100  |
| H | 6.22266100  | -2.18911900 | 2.32777700  |
| H | 2.11755000  | 1.73448700  | 2.58577400  |
| H | 3.68540100  | 1.80616000  | 3.40694600  |
| H | 3.29580400  | 2.97517000  | 2.13075500  |
| H | -5.80736000 | 3.13382400  | 1.63913700  |
| C | -5.61549800 | 2.88662500  | 0.59105200  |
| H | -6.07785900 | 1.91605400  | 0.37523900  |
| H | -6.11409300 | 3.63879900  | -0.03157900 |
| C | -4.12449100 | 2.85878800  | 0.30213400  |
| C | -3.19005800 | 3.20187400  | 1.28469700  |
| C | -3.65401600 | 2.53261200  | -0.97573400 |
| C | -1.81384200 | 3.20553800  | 1.02485800  |
| H | -3.53923000 | 3.50214300  | 2.26765000  |
| C | -2.28769400 | 2.53444400  | -1.27601000 |

|    |             |             |             |
|----|-------------|-------------|-------------|
| H  | -4.36609700 | 2.30256000  | -1.76284100 |
| C  | -1.34989100 | 2.84030900  | -0.26071500 |
| C  | -0.84445300 | 3.65789900  | 2.10412200  |
| C  | -1.83472600 | 2.26078500  | -2.70069500 |
| H  | -0.30376300 | 4.55614700  | 1.78385000  |
| H  | -1.38195700 | 3.89406600  | 3.02719400  |
| H  | -0.09942400 | 2.88413900  | 2.32053800  |
| H  | -1.46463800 | 3.17865900  | -3.17257400 |
| H  | -1.02062900 | 1.53036700  | -2.72887000 |
| H  | -2.66960600 | 1.88687600  | -3.30143100 |
| H  | -2.06786900 | -0.06312900 | -0.18068900 |
| H  | -1.11701000 | 0.40558700  | 0.13298300  |
| Rh | -1.01773800 | -1.30923500 | -0.13333600 |

#### 4b

|   |             |            |             |
|---|-------------|------------|-------------|
| C | 1.15034700  | 3.45523100 | 1.11908400  |
| C | 0.07625600  | 3.82305000 | 0.20105700  |
| C | -1.10926600 | 3.10366600 | 0.60189300  |
| C | -0.73091200 | 2.24659600 | 1.68276800  |
| C | 0.65811600  | 2.47876600 | 2.02167100  |
| C | 2.47990100  | 4.14351600 | 1.20256000  |
| H | 2.37204700  | 5.08078200 | 1.76534600  |
| H | 3.22422000  | 3.53653500 | 1.72422700  |
| H | 2.87617100  | 4.40699900 | 0.21827400  |
| C | 0.12003800  | 4.96690400 | -0.77090600 |
| H | -0.12978700 | 5.90637300 | -0.25898700 |
| H | 1.11149200  | 5.09068500 | -1.21393400 |
| H | -0.59658000 | 4.83144800 | -1.58461700 |
| C | -2.49950100 | 3.30803300 | 0.06843800  |
| H | -3.03060100 | 4.05897800 | 0.66918800  |
| H | -2.48263500 | 3.66513700 | -0.96459500 |
| H | -3.09069500 | 2.38829000 | 0.09443100  |
| C | -1.64973000 | 1.34695500 | 2.44644600  |
| H | -2.00038000 | 1.85596100 | 3.35487500  |
| H | -2.52362300 | 1.06915000 | 1.85609200  |
| H | -1.14571500 | 0.42848700 | 2.76096300  |
| C | 1.35897600  | 1.93745400 | 3.23297000  |
| H | 2.44635600  | 1.95513800 | 3.11750500  |
| H | 1.11402100  | 2.53896500 | 4.11970600  |
| H | 1.06496900  | 0.90822100 | 3.44844200  |
| P | 2.44260600  | 1.38750900 | -1.44321800 |
| C | 2.87743800  | 2.84353900 | -2.50051800 |
| H | 3.79452500  | 2.64571800 | -3.06639400 |

|   |             |             |             |
|---|-------------|-------------|-------------|
| H | 2.06049400  | 3.04004300  | -3.20075100 |
| H | 3.03297800  | 3.73823100  | -1.89203200 |
| C | 2.46974700  | 0.00440600  | -2.66335100 |
| H | 3.39041400  | 0.05759000  | -3.25496600 |
| H | 2.44057700  | -0.95492100 | -2.14218200 |
| H | 1.60763300  | 0.07722500  | -3.33170800 |
| C | 3.97315600  | 1.09599900  | -0.44674800 |
| H | 4.85133400  | 1.04179400  | -1.10083000 |
| H | 4.11863500  | 1.90783900  | 0.27007100  |
| H | 3.87354800  | 0.15111500  | 0.09429800  |
| S | -0.32552700 | -0.64517000 | -0.77932600 |
| C | -0.82517200 | -2.11477300 | 0.18428700  |
| C | 0.18908700  | -3.00299200 | 0.59115600  |
| C | -2.19714000 | -2.43550400 | 0.34409700  |
| C | -0.18655000 | -4.20519700 | 1.20733700  |
| C | -2.51448000 | -3.66092700 | 0.94725100  |
| C | -1.52602400 | -4.53610500 | 1.38802000  |
| H | 0.59524200  | -4.88947100 | 1.52377900  |
| H | -3.56219300 | -3.92344100 | 1.05729500  |
| H | -1.79909000 | -5.47883400 | 1.85262400  |
| H | 1.51451300  | -2.80239000 | 3.27857100  |
| C | 1.84310200  | -1.90160500 | 2.74611100  |
| H | 0.96661600  | -1.25802400 | 2.61660300  |
| H | 2.57140400  | -1.38115700 | 3.37466800  |
| C | 2.45603100  | -2.26761000 | 1.40549700  |
| C | 3.83951100  | -2.17923600 | 1.21914700  |
| C | 1.64435400  | -2.76459500 | 0.36051900  |
| C | 4.44487400  | -2.58857600 | 0.02269000  |
| H | 4.46022000  | -1.81865100 | 2.03438700  |
| C | 2.23985600  | -3.18628900 | -0.85005500 |
| C | 3.63056700  | -3.08450700 | -0.99921300 |
| C | 5.95360700  | -2.52683500 | -0.13591700 |
| C | 1.40281400  | -3.78788700 | -1.96773100 |
| H | 4.08455400  | -3.42369000 | -1.92496700 |
| H | 6.33609600  | -1.52751200 | 0.10284700  |
| H | 6.43895100  | -3.23990800 | 0.54124700  |
| H | 6.25176200  | -2.77494700 | -1.15853000 |
| H | 0.58668300  | -3.11878100 | -2.26177400 |
| H | 2.02319500  | -3.98308500 | -2.84700500 |
| H | 0.95504000  | -4.73619200 | -1.64755000 |
| H | -6.03654000 | 1.97009900  | -2.00466800 |
| C | -6.46749400 | 1.11069100  | -1.47660300 |
| H | -7.05899300 | 1.48685700  | -0.63710500 |
| H | -7.14345800 | 0.59743500  | -2.16950000 |



|    |             |             |             |
|----|-------------|-------------|-------------|
| C  | -5.37642200 | 0.17081200  | -0.99625600 |
| C  | -4.61578000 | -0.56311100 | -1.91481500 |
| C  | -5.12780200 | -0.01479700 | 0.36643800  |
| C  | -3.60214000 | -1.43326500 | -1.50197300 |
| H  | -4.83526200 | -0.47885500 | -2.97446100 |
| C  | -4.12100100 | -0.87718000 | 0.82452300  |
| H  | -5.74690300 | 0.50087900  | 1.09381600  |
| C  | -3.30890100 | -1.55292700 | -0.11641000 |
| C  | -2.89903900 | -2.30370500 | -2.53506800 |
| C  | -3.99720800 | -1.12678800 | 2.32176300  |
| H  | -3.07880300 | -3.36372800 | -2.32096200 |
| H  | -3.28576400 | -2.08669500 | -3.53465200 |
| H  | -1.81477200 | -2.14841900 | -2.54955200 |
| H  | -4.53728100 | -2.04240800 | 2.59391100  |
| H  | -2.95907800 | -1.25162300 | 2.63766100  |
| H  | -4.44300100 | -0.30234200 | 2.88661600  |
| H  | -0.08109800 | 1.78716600  | -1.69060500 |
| H  | -1.60318400 | -0.26930200 | -1.02115200 |
| Rh | 0.46826200  | 1.70031300  | -0.22216500 |
